# Supplementary material
Source: Springer Nature journal article supplement (https://www.springermedizin.de/resource/supplementary/13023_2012_402_MOESM3_ESM.pdf/9642278)
Supplement: MOESM3 [file 9642278]

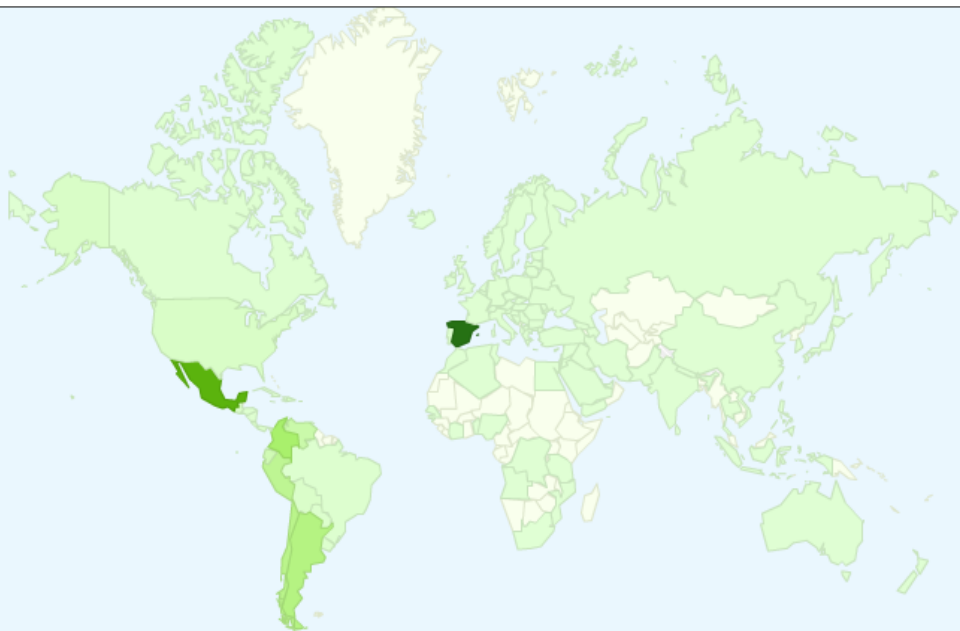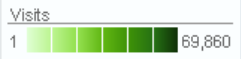

Viewing: **Country/Territory** [City](#) [Continent](#) [Sub Continent](#) [Region](#)

Secondary dimension:    View:  1 - 10 of 115

|     | Country/Territory             | Visits ↓ | Pages/Visit | Avg. Time on Site | % New Visits | Bounce Rate |
|-----|-------------------------------|----------|-------------|-------------------|--------------|-------------|
| 1.  | <a href="#">Spain</a>         | 69,860   | 4.11        | 00:03:47          | 67.84%       | 51.02%      |
| 2.  | <a href="#">Mexico</a>        | 43,364   | 1.94        | 00:01:58          | 86.27%       | 68.45%      |
| 3.  | <a href="#">Colombia</a>      | 21,407   | 2.06        | 00:02:03          | 85.83%       | 67.23%      |
| 4.  | <a href="#">Argentina</a>     | 16,727   | 2.82        | 00:02:56          | 85.31%       | 60.84%      |
| 5.  | <a href="#">Chile</a>         | 14,895   | 2.04        | 00:02:24          | 84.16%       | 66.00%      |
| 6.  | <a href="#">Peru</a>          | 13,219   | 2.00        | 00:02:15          | 86.87%       | 67.52%      |
| 7.  | <a href="#">Venezuela</a>     | 8,516    | 2.01        | 00:01:55          | 89.71%       | 68.45%      |
| 8.  | <a href="#">Ecuador</a>       | 6,256    | 1.85        | 00:01:38          | 88.49%       | 69.10%      |
| 9.  | <a href="#">United States</a> | 2,674    | 2.74        | 00:12:31          | 84.97%       | 61.26%      |
| 10. | <a href="#">Bolivia</a>       | 2,215    | 1.90        | 00:01:59          | 90.97%       | 68.08%      |
